# Supplementary material for: Specific glycine-dependent enzyme motion determines the potency of conformation selective inhibitors of threonyl-tRNA synthetase
Source: PubMed Central journal article supplement (PMC11252418; doi:10.1038/s42003-024-06559-x), 2024-07-16
Supplement: 42003_2024_6559_MOESM2_ESM.pdf [file 42003_2024_6559_MOESM2_ESM.pdf]

## **Specific Glycine Dependent Enzyme Motion Determines the Potency of Conformation Selective Inhibitors of Threonyl-tRNA Synthetase**

Hang Qiao<sup>1,#</sup>, Zilu Wang<sup>1,#</sup>, Hao Yang<sup>2,#</sup>, Mingyu Xia<sup>1</sup>, Guang Yang<sup>3</sup>, Fang Bai<sup>2,4,5\*</sup>, Jing Wang<sup>1,3\*</sup>, Pengfei Fang<sup>1,3,6\*</sup>

### **CONTENTS**

|                                                  |          |
|--------------------------------------------------|----------|
| <b>I. Legends for Supplementary Movies</b> ..... | <b>3</b> |
| <b>II. Supplementary Tables</b> .....            | <b>4</b> |
| Supplementary Table 1.....                       | 4        |
| Supplementary Table 2.....                       | 5        |
| Supplementary Table 3.....                       | 6        |
| Supplementary Table 4.....                       | 7        |
| Supplementary Table 5.....                       | 8        |
| <b>III. Supplementary Figures</b> .....          | <b>9</b> |
| Supplementary Figure 1 .....                     | 9        |
| Supplementary Figure 2 .....                     | 11       |
| Supplementary Figure 3 .....                     | 13       |
| Supplementary Figure 4 .....                     | 14       |
| Supplementary Figure 5 .....                     | 15       |
| Supplementary Figure 6 .....                     | 16       |
| Supplementary Figure 7 .....                     | 17       |
| Supplementary Figure 8 .....                     | 18       |
| Supplementary Figure 9 .....                     | 19       |
| Supplementary Figure 10 .....                    | 20       |
| Supplementary Figure 11 .....                    | 21       |
| Supplementary Figure 12 .....                    | 22       |
| Supplementary Figure 13 .....                    | 23       |
| Supplementary Figure 14 .....                    | 24       |

|                                              |           |
|----------------------------------------------|-----------|
| Supplementary Figure 15 .....                | 25        |
| Supplementary Figure 16 .....                | 26        |
| Supplementary Figure 17 .....                | 27        |
| <b>IV. Supplementary Note 1 .....</b>        | <b>28</b> |
| Key resources table .....                    | 28        |
| Coding sequence of <i>Ec</i> ThrRS_WT .....  | 31        |
| Protein sequence of <i>Ec</i> ThrRS_WT ..... | 31        |
| Coding sequence of <i>Oba</i> O_WT .....     | 32        |
| Protein sequence of <i>Oba</i> O_WT .....    | 32        |
| Abbreviations .....                          | 33        |
| <b>V. Supplementary References .....</b>     | <b>34</b> |

## I. Legends for Supplementary Movies

### Supplementary Movie 1

This movie shows the different dynamic behaviours of *Ec*ThrRS\_WT (shown as blue ribbon) and G463S (shown as light cyan ribbon) compared to a static *apo* state structure (shown as pink ribbon). Residues 422–448 are highlighted in red. During MD simulation, the WT underwent larger conformational changes, while the G463S tended to remain in a closed state and move within a smaller range.

### Supplementary Movie 2

This movie shows the proposed binding process of OB to *Ec*ThrRS\_WT. *Ec*ThrRS\_WT undergoes larger conformational changes, which allow OB to bind the tRNA site instead of the ATP site to form a covalent bond with Tyr462 and prevent ThrRS from binding ATP. The *Ec*ThrRS\_G463A–OB (PDB code: 8WII) and *Ec*ThrRS\_WT–OB (PDB code: 8H98) complex structures were used as models for morph operation. This movie was prepared with ChimeraX (<https://www.cgl.ucsf.edu/chimerax>).

### Supplementary Movie 3

This movie shows the proposed unstable binding of OB to *Ec*ThrRS\_G463A. Because the structure of this mutant is relatively rigid, OB cannot reach the tRNA A76 binding site. When it binds to ThrRS's ATP site, it can be competed out by ATP. The *Ec*ThrRS\_G463A–OB (PDB code: 8WII) and *Ec*ThrRS\_G463A–ATP (PDB code: 8WIH) complex structures were used as models for morph operation. This movie was prepared with ChimeraX (<https://www.cgl.ucsf.edu/chimerax>).

## II. Supplementary Tables

**Supplementary Table 1. Statistics of X-ray crystallographic data collection and model refinements of *EcThrRS\_G463S*.**

| <i>EcThrRS_G463S</i>                                     |                                                 |
|----------------------------------------------------------|-------------------------------------------------|
| <b>PDB code</b>                                          | 8WIA                                            |
| <b>Data collection</b>                                   |                                                 |
| Space group                                              | <i>P2<sub>1</sub>2<sub>1</sub>2<sub>1</sub></i> |
| Cell dimensions                                          |                                                 |
| <i>a, b, c</i> (Å)                                       | 90.96, 107.41, 112.80                           |
| $\alpha, \beta, \gamma$ (°)                              | 90.00, 90.00, 90.00                             |
| Resolution (Å)                                           | 42.18-1.96 (2.03-1.96)*                         |
| <i>R</i> <sub>sym</sub> or <i>R</i> <sub>merge</sub> (%) | 8.9 (92.2)                                      |
| <i>I</i> / <i>sI</i>                                     | 12.9 (2.5)                                      |
| Completeness (%)                                         | 97.2 (99.9)                                     |
| Redundancy                                               | 7.3 (7.5)                                       |
| <b>Refinement</b>                                        |                                                 |
| No. reflections                                          | 77735 (7919)                                    |
| <i>R</i> <sub>work</sub> / <i>R</i> <sub>free</sub> (%)  | 21.3/23.8                                       |
| No. atoms                                                |                                                 |
| Protein                                                  | 6551                                            |
| Metal                                                    | 2                                               |
| Solvent                                                  | 574                                             |
| <i>B</i> -factors (Å <sup>2</sup> )                      |                                                 |
| Protein                                                  | 37.05                                           |
| Metal                                                    | 37.68                                           |
| Solvent                                                  | 41.93                                           |
| R.m.s. deviations                                        |                                                 |
| Bond lengths (Å)                                         | 0.002                                           |
| Bond angles (°)                                          | 0.48                                            |
| Ramachandran plot                                        |                                                 |
| <i>Most favored</i> [%]                                  | 99.62                                           |
| <i>Additional allowed</i> [%]                            | 0.38                                            |

\*Values in parentheses are for the highest-resolution shell.

**Supplementary Table 2. Statistics of X-ray crystallographic data collection and model refinements of *Ec*ThrRS\_L489M–OB.**

| <i>Ec</i> ThrRS_L489M–OB                                 |                                                 |
|----------------------------------------------------------|-------------------------------------------------|
| <b>PDB code</b>                                          | 8WIJ                                            |
| <b>Data collection</b>                                   |                                                 |
| Space group                                              | <i>P2<sub>1</sub>2<sub>1</sub>2<sub>1</sub></i> |
| Cell dimensions                                          |                                                 |
| <i>a</i> , <i>b</i> , <i>c</i> (Å)                       | 103.25, 84.24, 102.59                           |
| $\alpha$ , $\beta$ , $\gamma$ (°)                        | 90.00, 90.00, 90.00                             |
| Resolution (Å)                                           | 36.39–3.08 (3.19–3.08)*                         |
| <i>R</i> <sub>sym</sub> or <i>R</i> <sub>merge</sub> (%) | 19.0 (105.1)                                    |
| <i>I</i> / <i>sI</i>                                     | 9.4 (2.6)                                       |
| Completeness (%)                                         | 91.3 (99.7)                                     |
| Redundancy                                               | 6.4 (6.7)                                       |
| <b>Refinement</b>                                        |                                                 |
| No. reflections                                          | 15640 (1680)                                    |
| <i>R</i> <sub>work</sub> / <i>R</i> <sub>free</sub> (%)  | 24.0/28.0                                       |
| No. atoms                                                |                                                 |
| Protein                                                  | 6515                                            |
| Ligand                                                   | 52                                              |
| Metal                                                    | 2                                               |
| Solvent                                                  | 12                                              |
| <i>B</i> -factors (Å <sup>2</sup> )                      |                                                 |
| Protein                                                  | 70.12                                           |
| Ligand                                                   | 76.72                                           |
| Metal                                                    | 61.70                                           |
| Solvent                                                  | 60.87                                           |
| R.m.s. deviations                                        |                                                 |
| Bond lengths (Å)                                         | 0.002                                           |
| Bond angles (°)                                          | 0.45                                            |
| Ramachandran plot                                        |                                                 |
| <i>Most favored</i> [%]                                  | 98.74                                           |
| <i>Additional allowed</i> [%]                            | 1.26                                            |

\*Values in parentheses are for the highest-resolution shell.

**Supplementary Table 3. Statistics of X-ray crystallographic data collection and model refinements of *Ec*ThrRS\_G463S\_Q484A.**

| <i>Ec</i> ThrRS_G463S_Q484A                              |                                                       |
|----------------------------------------------------------|-------------------------------------------------------|
| <b>PDB code</b>                                          | 8WIG                                                  |
| <b>Data collection</b>                                   |                                                       |
| Space group                                              | <i>P</i> 2 <sub>1</sub> 2 <sub>1</sub> 2 <sub>1</sub> |
| Cell dimensions                                          |                                                       |
| <i>a</i> , <i>b</i> , <i>c</i> (Å)                       | 91.14, 108.11, 113.50                                 |
| $\alpha$ , $\beta$ , $\gamma$ (°)                        | 90.00, 90.00, 90.00                                   |
| Resolution (Å)                                           | 56.21-3.22 (3.33-3.22)*                               |
| <i>R</i> <sub>sym</sub> or <i>R</i> <sub>merge</sub> (%) | 11.4 (63.9)                                           |
| <i>I</i> / <i>sI</i>                                     | 10.6 (2.5)                                            |
| Completeness (%)                                         | 99.6 (99.8)                                           |
| Redundancy                                               | 4.6 (4.5)                                             |
| <b>Refinement</b>                                        |                                                       |
| No. reflections                                          | 18371 (1808)                                          |
| <i>R</i> <sub>work</sub> / <i>R</i> <sub>free</sub> (%)  | 21.0/22.4                                             |
| No. atoms                                                |                                                       |
| Protein                                                  | 6539                                                  |
| Metal                                                    | 2                                                     |
| <i>B</i> -factors (Å <sup>2</sup> )                      |                                                       |
| Protein                                                  | 68.44                                                 |
| Metal                                                    | 60.14                                                 |
| R.m.s. deviations                                        |                                                       |
| Bond lengths (Å)                                         | 0.002                                                 |
| Bond angles (°)                                          | 0.43                                                  |
| Ramachandran plot                                        |                                                       |
| <i>Most favored</i> [%]                                  | 99.25                                                 |
| <i>Additional allowed</i> [%]                            | 0.75                                                  |

\*Values in parentheses are for the highest-resolution shell.

**Supplementary Table 4. Statistics of X-ray crystallographic data collection and model refinements of EcThrRS\_G463A-OB.**

| <i>EcThrRS_G463A-OB</i>                                  |                                                 |
|----------------------------------------------------------|-------------------------------------------------|
| <b>PDB code</b>                                          | 8WII                                            |
| <b>Data collection</b>                                   |                                                 |
| Space group                                              | <i>P2<sub>1</sub>2<sub>1</sub>2<sub>1</sub></i> |
| Cell dimensions                                          |                                                 |
| <i>a, b, c</i> (Å)                                       | 90.40, 108.81, 113.77                           |
| $\alpha, \beta, \gamma$ (°)                              | 90.00, 90.00, 90.00                             |
| Resolution (Å)                                           | 78.64-2.98 (3.08-2.98)*                         |
| <i>R</i> <sub>sym</sub> or <i>R</i> <sub>merge</sub> (%) | 13.1 (80.3)                                     |
| <i>I</i> / <i>sI</i>                                     | 6.8 (2.4)                                       |
| Completeness (%)                                         | 99.3 (99.5)                                     |
| Redundancy                                               | 4.2 (4.4)                                       |
| <b>Refinement</b>                                        |                                                 |
| No. reflections                                          | 23476 (2313)                                    |
| <i>R</i> <sub>work</sub> / <i>R</i> <sub>free</sub> (%)  | 0.250 (0.301)                                   |
| No. atoms                                                |                                                 |
| Protein                                                  | 6545                                            |
| Ligand                                                   | 52                                              |
| Metal                                                    | 2                                               |
| <i>B</i> -factors (Å <sup>2</sup> )                      |                                                 |
| Protein                                                  | 69.00                                           |
| Ligand                                                   | 92.53                                           |
| Metal                                                    | 81.58                                           |
| R.m.s. deviations                                        |                                                 |
| Bond lengths (Å)                                         | 0.007                                           |
| Bond angles (°)                                          | 1.24                                            |
| Ramachandran plot                                        |                                                 |
| <i>Most favored</i> [%]                                  | 98.25                                           |
| <i>Additional allowed</i> [%]                            | 1.75                                            |

\*Values in parentheses are for the highest-resolution shell.

**Supplementary Table 5. Statistics of X-ray crystallographic data collection and model refinements of *Ec*ThrRS\_G463A-ATP.**

| <i>Ec</i> ThrRS_G463A-ATP                  |                         |
|--------------------------------------------|-------------------------|
| <b>PDB code</b>                            | 8WIH                    |
| <b>Data collection</b>                     |                         |
| Space group                                | $P2_12_12_1$            |
| Cell dimensions                            |                         |
| <i>a</i> , <i>b</i> , <i>c</i> (Å)         | 87.18, 109.38, 113.79   |
| $\alpha$ , $\beta$ , $\gamma$ (°)          | 90.00, 90.00, 90.00     |
| Resolution (Å)                             | 50.48-2.44 (2.52-2.44)* |
| $R_{\text{sym}}$ or $R_{\text{merge}}$ (%) | 11.3 (81.4)             |
| <i>I</i> / <i>sI</i>                       | 14.2 (2.8)              |
| Completeness (%)                           | 88.6 (96.5)             |
| Redundancy                                 | 8.9 (6.6)               |
| <b>Refinement</b>                          |                         |
| No. reflections                            | 36683 (3927)            |
| $R_{\text{work}}$ / $R_{\text{free}}$ (%)  | 24.2 (26.4)             |
| No. atoms                                  |                         |
| Protein                                    | 6398                    |
| Ligand                                     | 50                      |
| Metal                                      | 2                       |
| Solvent                                    | 48                      |
| <i>B</i> -factors (Å <sup>2</sup> )        |                         |
| Protein                                    | 46.77                   |
| Ligand                                     | 40.30                   |
| Metal                                      | 38.45                   |
| Solvent                                    | 43.72                   |
| R.m.s. deviations                          |                         |
| Bond lengths (Å)                           | 0.003                   |
| Bond angles (°)                            | 0.56                    |
| Ramachandran plot                          |                         |
| <i>Most favored</i> [%]                    | 98.87                   |
| <i>Additional allowed</i> [%]              | 1.13                    |

\*Values in parentheses are for the highest-resolution shell.



### III. Supplementary Figures

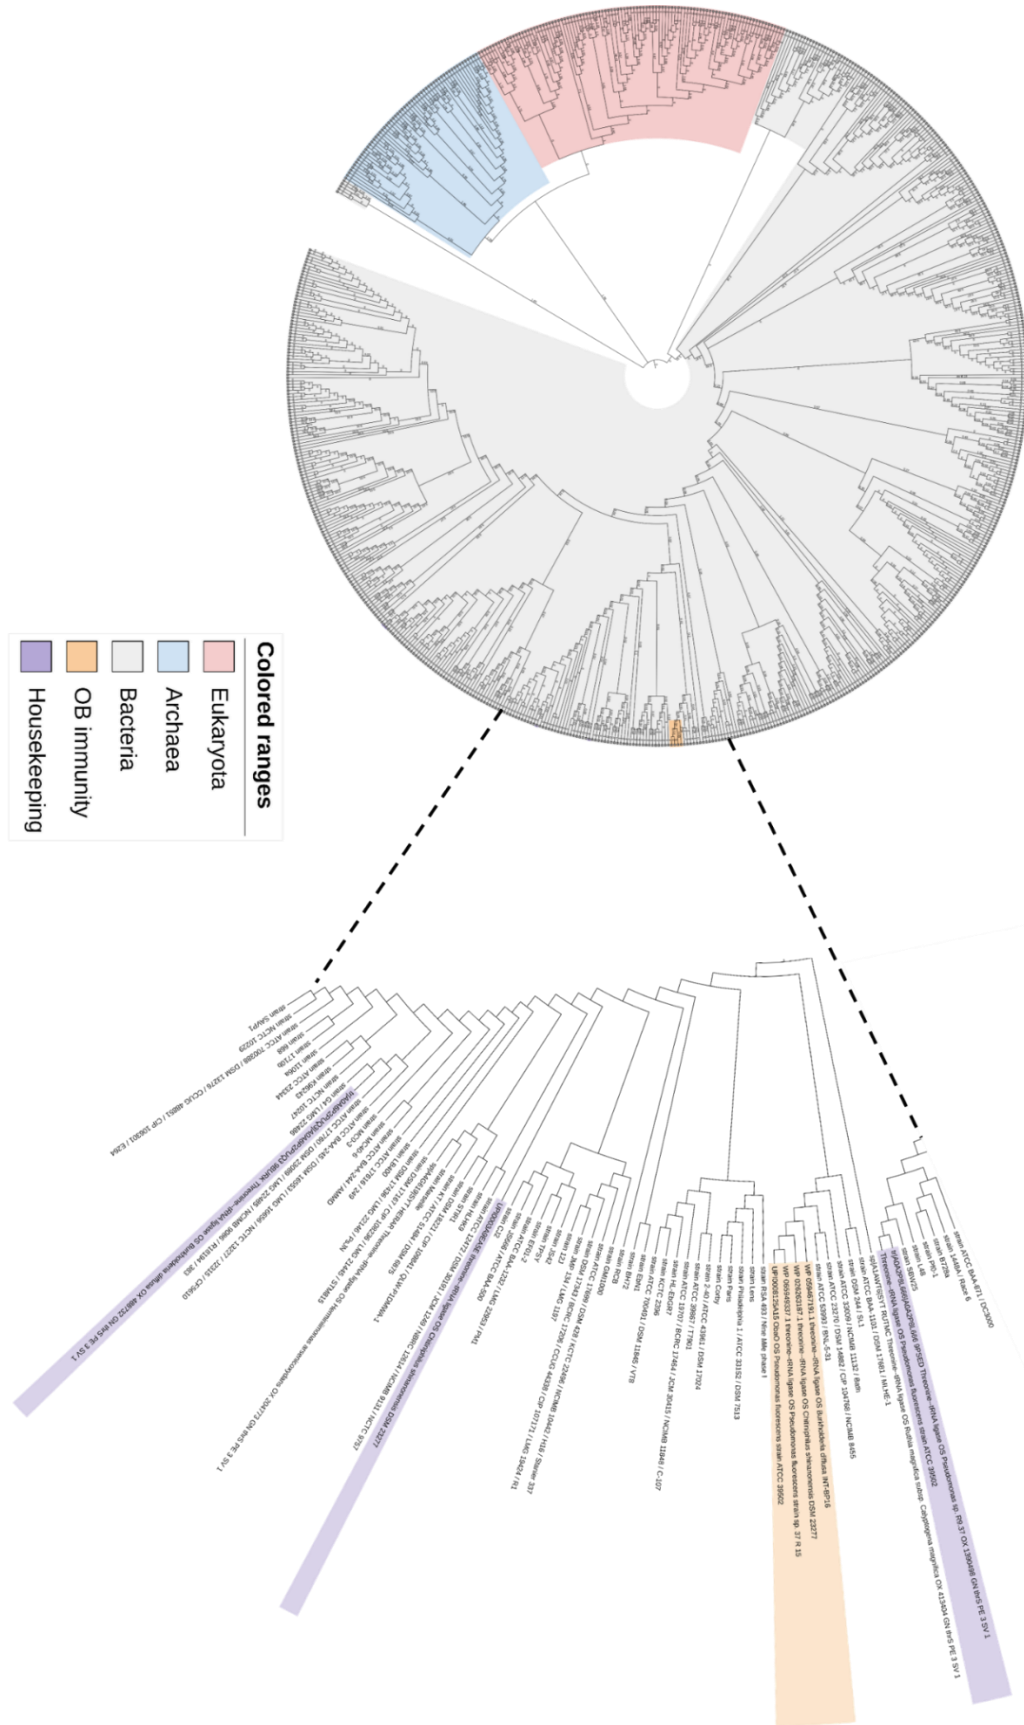

**Supplementary Figure 1. OB-resistant ThrRSs are more closely related to each other than to their housekeeping ThrRS equivalents.**

Maximum likelihood tree of ThrRS amino acid sequences. 4 putative OB immune proteins clade with each other rather than housekeeping ThrRSs from the same species. The tree was constructed using Swiss-Prot reviewed ThrRS amino acid sequences retrieved from UniProtKB<sup>1</sup> using the ENZYME<sup>2</sup> entry identifier E.C.6.1.1.3, along with the nonredundant amino acid sequences of ObaO (*Pseudomonas fluorescens* ATCC 39502, NCBI entry: KX931446.1) and another 3 homologs identified from OB BGCs (*Pseudomonas fluorescens* ATCC 37 R 15, NCBI entry: NZ\_CVTV01000010.1; *Burkholderia diffusa* INT-BP16, NCBI entry: NZ\_LOUS01000041.1; *Chitiniphilus shinanonensis* DSM 23277, PDB entry: NZ\_KB895358.1). MEGA7<sup>3</sup> was applied to generate a variant phylogenetic tree and the tree was represented using iTOL v6<sup>4</sup>.

E\_coli\_ThrRS 1 M P V I T L P D G S R H Y D H A V S P M D V A L D T G P G L A K A C I A C R V N G S L V D A C D L I E N D A Q L S T I  
 P\_fluorescens\_ThrRS 1 M P T I I L P D G S R S F D H P V S V A E V A A S T G A G L A K A T V A C K V D G Q L V D A S D L I T S D A S L Q I F  
 B\_diffusa\_ThrRS 1 M V S I R L P D G S V R Q Y E H P V T V A E V A A S I G P G L A K A A L G K L D G S L V D T S Y L I D R D A S L A I V  
 C\_shinanonensis\_ThrRS 1 . . M I L P D G S R Q F D A P V T V A G V A A S T G A G L A R A A L A G K V D G L V D T S Y L I D R D V Q L A I V  
 P\_fluorescens\_ObaO 1 M V T I A L P D G S R R D F P E A L T V Q Q L A Q S I G A G L A A A T I G K V D G L V D A S Y L L E T D A T A E I V  
 B\_diffusa\_OBRes 1 M I S I A L P D G S R R A Y D H P V T V A A L A A D I G P G L A K A A L A G K I D G L V D L D Y L I D I D A T A E I V  
 C\_shinanonensis\_OBRes 1 M I T I S L P D G S R R E F A F E I S V H E L A C A I G P G L G A A L A G K V D G L V D T A H L L R H D A T A E I V

E\_coli\_ThrRS 61 T A K D E E G L E I I R H S C A H L L G H A I K Q L W P H T K M A I G P V I D N G F Y Y D V D L D R T L T Q E D V E A L  
 P\_fluorescens\_ThrRS 61 T P K D Q E G L E I I R H S C A H L I G H A V K Q L Y P T A K M V I G P V I E E G F Y Y D I A Y E R P F T P D D L A A I  
 B\_diffusa\_ThrRS 61 T D K D A D G L D I I R H S T A H L L A Y A V K D L Y P D A Q V T I G P V I D N G F Y Y D F S Y N R P F T P E D L E K I  
 C\_shinanonensis\_ThrRS 59 T E R D A D G L D V I R H S T A H L L A Y A V K E L F S S A Q V T I G P V I E D G F Y Y D F S Y E R P F T P E D L D A I  
 P\_fluorescens\_ObaO 61 T T K S P Q A L E L I R H S T A H L M A Q A V Q R L Y P G T Q V T I G P V I D N G F Y Y D F V A P R P F T M D D L P L I  
 B\_diffusa\_OBRes 61 T E K H P D A L S I I R H S C A H L L A Q A V Q R L Y P A A Q F S I G P V I E N G F Y Y D I S I S P P L S E D D L P R I  
 C\_shinanonensis\_OBRes 61 T D R H P D A L E V V R H S T A H L L A Q A V Q R L Y P G T Q V T I G P V I D N G F Y Y D F A G E R P F T V E D L P A I

E\_coli\_ThrRS 121 E K R M H E L A E K N Y D V I K K V S W H E A R E T F A N R G E S Y K V S I L D E N I A H D K P G L Y F H E E Y V D  
 P\_fluorescens\_ThrRS 121 E Q R M H A L I E K D Y D V I K K V T P R A E V I D V F T A R G E D D Y K L R L V E . D M P D E Q A M G L Y Y H E E Y V D  
 B\_diffusa\_ThrRS 121 E K R M Q E L A K K D E P V T R R V V S R D E A A G Y F R S L G E K Y K A E I I E . S I P Q S D E I K L Y S H G G F T D  
 C\_shinanonensis\_ThrRS 119 E K K M F E L S K K D I P V E R Y E L S R D D A V A Y E K G I C E A Y K A E I I E . S I P Q N E V L S L Y R G D F T D  
 P\_fluorescens\_ObaO 121 E A E M T R I V K E Q L P V T R Y Q L P R D E A L A F F E Q L C E S Y K T Q I I D . A I P A G E T L L S L Y T Q G E F T D  
 B\_diffusa\_OBRes 121 E A E M R A I V A E A V P V S R A V L S R D D A I R F F S D R G Q T Y K A E I V A . S I P E H E Q L T I V T Q G E F S D  
 C\_shinanonensis\_OBRes 121 E A E M A R I A K E A L P V T R S E K T R E Q A A Q F E E G L G E H Y K V E L L R . D I A D D Q P L S L Y T Q G E F T D

E\_coli\_ThrRS 181 M C R G P H V P N M R F C H H F K L M K T A G A Y W R G D S N N K M L O R I Y G T A W A D K K A L N A Y L Q R L E E A A  
 P\_fluorescens\_ThrRS 180 M C R G P H V P N T R F L K S F K L T K L S G A Y W R G D A K N E Q L O R I Y G T A W A D K K Q L A A Y I Q R I E E A E  
 B\_diffusa\_ThrRS 180 L C R G P H V P S T G K L K V F K L M K V A G A Y W R G D S K N E Q L O R I Y G T A W T K K E D D Q Q Y L H M L E E A E  
 C\_shinanonensis\_ThrRS 178 L C R G P H V P S T G K L K V F K L M K V A G A Y W R G D S R N E M L T R V Y G T A W A K K E D I D A Y L H R L E E A E  
 P\_fluorescens\_ObaO 180 L C R G P H V P N T A K L G A F K L M K V A G A Y W R G D S N N I M L S R I Y G T A W G N E K L K A Y L H N Q L Q E A E  
 B\_diffusa\_OBRes 180 L C R G P H V P N T R A L R A F K L M K T A G A Y W R G D S N N E M L C R V Y G T A W L N D A D L Q A Y L H Q L A E A E  
 C\_shinanonensis\_OBRes 180 L C R G P H V P N T G K L R A F K L M K V A G A Y W R G S D N A M L S R I Y G T A W L N D A D L K A Y L Q L E E A E

E\_coli\_ThrRS 241 K R D H R K I G K Q L D L Y H M Q E E A P G M V F W H N D G W T I F R E L E V F V R S K L K E Y Q Y Q E V K G P F M M D  
 P\_fluorescens\_ThrRS 240 K R D H R K I G K R L N L F H Q E E A P G M V F W H N G W T I Y Q V L E Q Y M R R V Q R E N G Y L E I K T P Q V D  
 B\_diffusa\_ThrRS 240 K R D H R K L G K Q L D L F H Q E E S P G M V F W H P K G W A L W Q V E Q Y M R R R V N E A C Y L E I K T P M I D  
 C\_shinanonensis\_ThrRS 238 K R D H R K I G K A L D L F H M Q E E A P G M V F W H P K G W S L W Q S V E Q Y I R R L A K A C Y Q E V R T P M M D  
 P\_fluorescens\_ObaO 240 K R D H R K L A K Q F D L F H Q E E A P G M V F W H P K G W S L W Q T V E Q Y M R R V Y R D G Y R E V S P Q V D  
 B\_diffusa\_OBRes 240 K R D H R K L G K Q L D L F H Q E E A P G M V F W H P K G W S V W Q V E Q Y M R R V Y V E C G Y Q E V K A P Q V D  
 C\_shinanonensis\_OBRes 240 K R D H R K I A K L D L F H Q E E A P G M V F W H Y K G W A L W Q A V E Q Y M R R V Y R D S C Y R E V K A P Q V D

E\_coli\_ThrRS 301 R V L W E K T G H W D N Y K D A M F T T S E N R E Y C I K P M N C P G H V Q I F N Q G L K S Y R D L P L R M A E F G S  
 P\_fluorescens\_ThrRS 300 R S L W E K S G H W A N Y A D N M F T T S E N R D Y A I K P M N C P C H V Q V F N Q G L K S Y R E L P M R L A E F G A  
 B\_diffusa\_ThrRS 300 R S L W E A S G H W O N Y R E N M F T T S E K R D Y A I K P M N C P G H V Q V F K H G L S R D L P L R Y A E F G S  
 C\_shinanonensis\_ThrRS 298 R S L W E K S G H W E N Y Q E N M F T T S E K R T Y A V K P M N C P G H I O I F S S D L R S R D L P L R L A E F G A  
 P\_fluorescens\_ObaO 300 S T L W K K S G H W D N Y K E N M F V T S E N R O Y A L K P M N C P G H I O I F K H G L R S R D L P L R Y G E F G G  
 B\_diffusa\_OBRes 300 V S L W K R S G H W D N Y K E N M F F T S E K R E Y A L K P M N C P G H I O I F K H G L R S R D L P L R Y G E F G G  
 C\_shinanonensis\_OBRes 300 V S L W R S G H W O N Y Q E N M F L T S E K R O Y A L K P M N C P G H I O I F K G L R S Y R E L P L R Y G E F G G

E\_coli\_ThrRS 361 C H R N E P S G S L H G L M R V R G F T Q D D A H I F C T E E Q I R D E V N G C I R L V Y D M Y S T F G F E K I V V K I  
 P\_fluorescens\_ThrRS 360 C H R N E P S G A L H G I M R V R G F T Q D D A H I F C T E E Q M Q A E S A A F I K L T M D V Y R D F G F T E V E M K L  
 B\_diffusa\_ThrRS 360 C H R N E A S G A L H G L M R V R G F V Q D D A H I F C T E E Q F I A E S I A F N T L A M S V Y K D F G F E H I D I K L  
 C\_shinanonensis\_ThrRS 358 C H R N E P S G A L H G L M R V R G F T Q D D A H I F C T E N Q L I D E A R I F H A L A M S V Y D F G F E G I A I K L  
 P\_fluorescens\_ObaO 360 C H R N E P S G A L H G I M R V R A F T Q D D G H I F C T E E Q I A A E I K A F H Y A V K V V A D F G F D I A V K I  
 B\_diffusa\_OBRes 360 C H R N E A S G A L H G I M R V R A F T Q D D G H I F C T E A Q I E D E V A A F H R R A M K V V R D F G F G D D S I A V  
 C\_shinanonensis\_OBRes 360 C H R N E P S G A L H G I M R V R A F T Q D D G H V F C T E E Q I A D E V Q A F H R Q A L K V V A D F G F D I A V K I



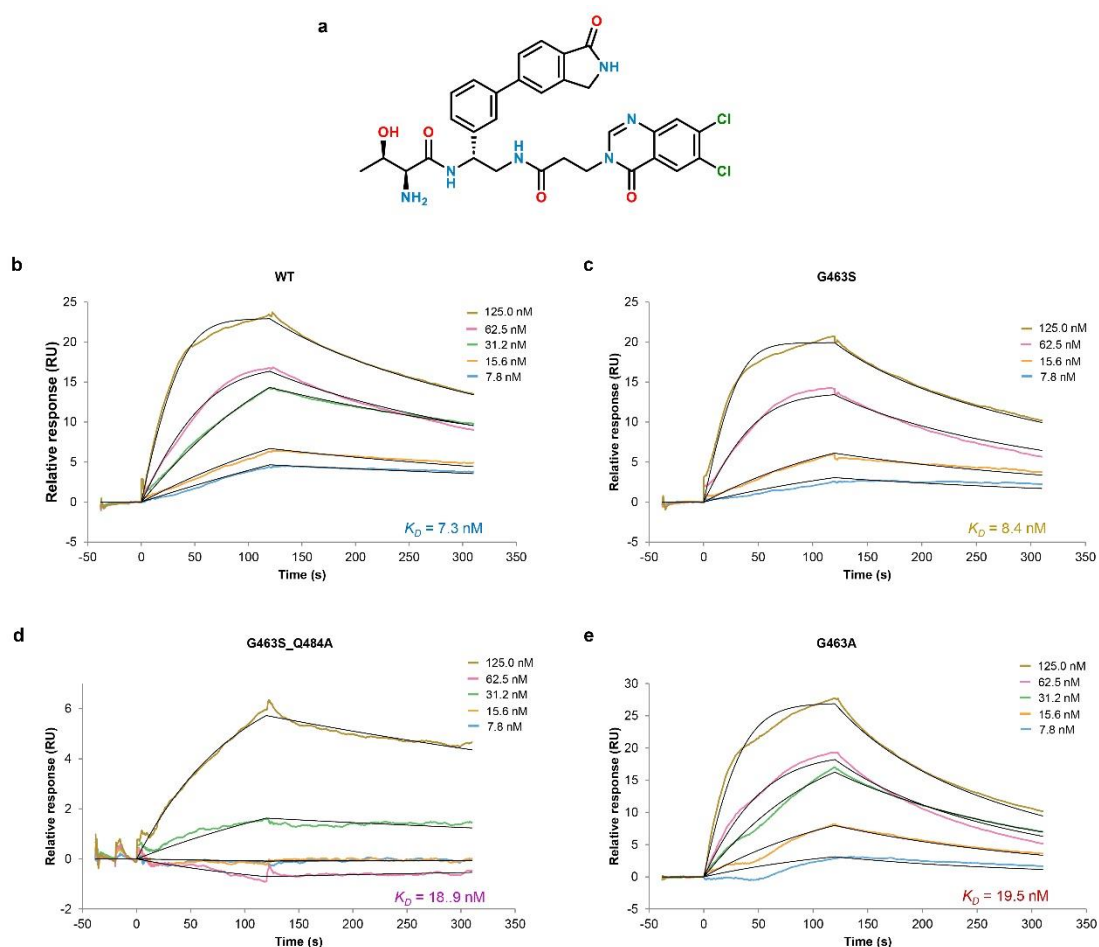

**Supplementary Figure 3. 36j retains strong binding affinity for *Ec*ThrRS\_WT, G463S, G463S\_Q484A and G463A.**

**(a)** Chemical structures of compound **36j**. **(b-e)** Surface plasmon resonance-based binding curves for **36j** binding to *Ec*ThrRS\_WT, G463S, G463S\_Q484A and G463A. **36j** was set in a twofold dilution series from 125 nM to 7.8 nM ( $n = 1$  for each series). Black lines show the fitting to a one-to-one kinetic binding model, RU, response unit. **(b)** *Ec*ThrRS\_WT. Association rate constant ( $k_a$ ) =  $5.56 \times 10^5 \cdot \text{M}^{-1} \cdot \text{s}^{-1}$  and dissociation rate constant ( $k_d$ ) =  $4.08 \times 10^{-3} \cdot \text{s}^{-1}$ ,  $K_D = 7.34 \times 10^{-9} \text{ M}$ ,  $R_{\text{max}} = 32.4 \text{ Ru}$ ,  $\chi^2 = 9.4 \times 10^{-2} \text{ RU}^2$ . **(c)** *Ec*ThrRS\_G463S.  $k_a = 6.87 \times 10^5 \cdot \text{M}^{-1} \cdot \text{s}^{-1}$  and  $k_d = 5.78 \times 10^{-3} \cdot \text{s}^{-1}$ ,  $K_D = 8.41 \times 10^{-9} \text{ M}$ ,  $R_{\text{max}} = 45.3 \text{ Ru}$ ,  $\chi^2 = 1.9 \times 10^{-1} \text{ RU}^2$ . **(d)** *Ec*ThrRS\_G463S\_Q484A.  $k_a = 7.39 \times 10^4 \cdot \text{M}^{-1} \cdot \text{s}^{-1}$  and  $k_d = 1.44 \times 10^{-3} \cdot \text{s}^{-1}$ ,  $K_D = 1.95 \times 10^{-8} \text{ M}$ ,  $R_{\text{max}} = 15.0 \text{ Ru}$ ,  $\chi^2 = 2.0 \times 10^{-2} \text{ RU}^2$ . **(e)** *Ec*ThrRS\_G463A.  $k_a = 4.46 \times 10^5 \cdot \text{M}^{-1} \cdot \text{s}^{-1}$  and  $k_d = 8.45 \times 10^{-3} \cdot \text{s}^{-1}$ ,  $K_D = 1.89 \times 10^{-8} \text{ M}$ ,  $R_{\text{max}} = 39.5 \text{ Ru}$ ,  $\chi^2 = 4.4 \times 10^{-1} \text{ RU}^2$ . These data confirmed that **36j** retains strong binding affinity for the key mutants in this study.

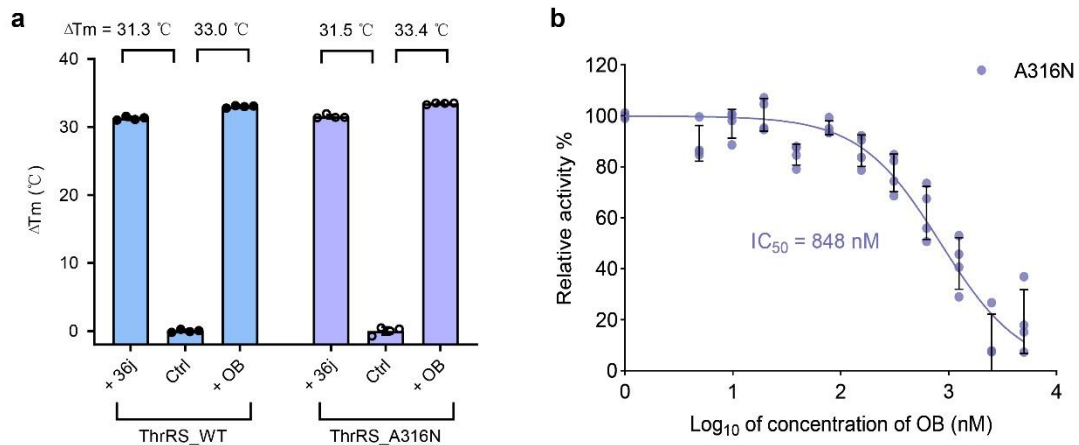

**Supplementary Figure 4. Mutation of Ala316 to asparagine does not confer resistance of OB to *EcThrRS*.**

**(a)** Diagram of the  $\Delta T_m$  values of *EcThrRS\_WT* and *EcThrRS\_A316N* in the presence or absence of OB and 36j. Evaluations were carried out in four repeats, and error bars indicate the respective standard deviation ( $n = 4$ , mean value  $\pm$  SD). All the data points are shown as small circles. **(b)** The inhibitory curve of OB on the ATP hydrolysis activity of *EcThrRS\_A316N*. Evaluations were carried out in four repeats, and error bars indicate the respective standard deviation ( $n = 4$ , mean value  $\pm$  SD). All the data points for *EcThrRS\_A316N* are shown as pale purple dots.

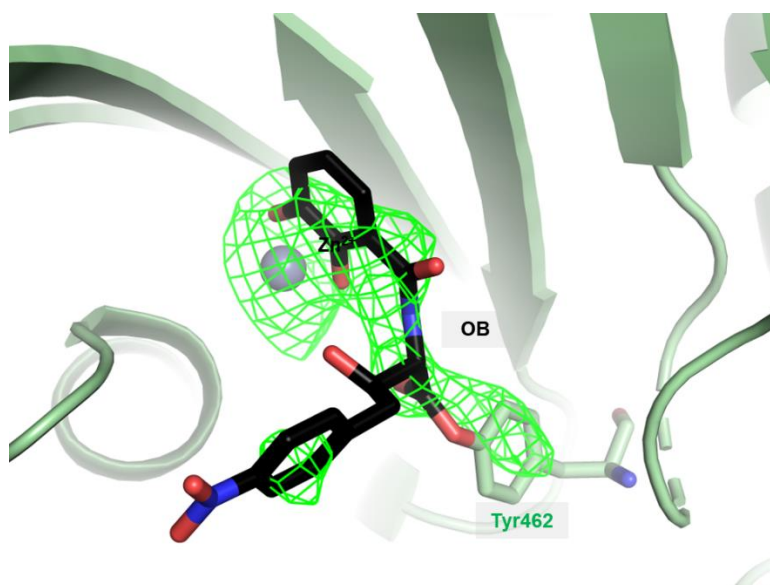

**Supplementary Figure 5. *EcThrRS\_L489M* can be covalently inhibited by OB.**

The Fo-Fc electron density was calculated with the OB-omitted structure model (made from the *EcThrRS\_L489M* OB structure), contoured at  $3.0 \sigma$ , and is shown as green meshes.

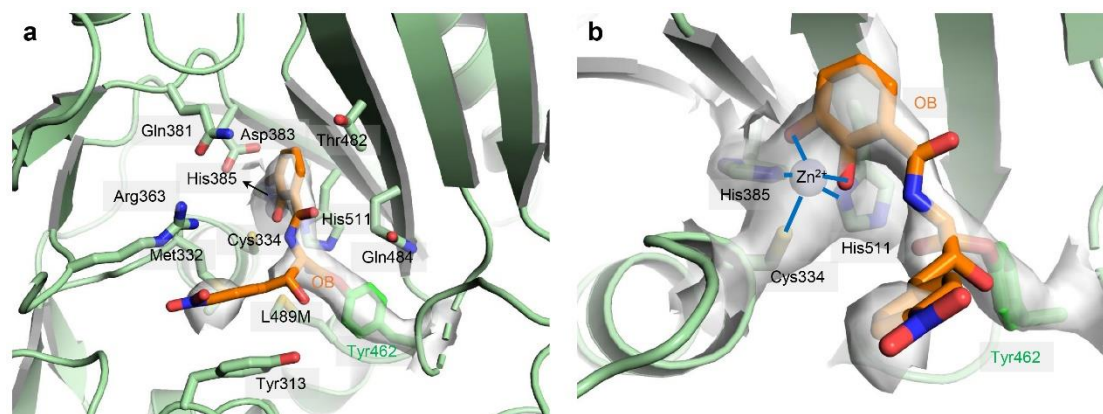

**Supplementary Figure 6. The binding mode of OB in the catalytic pocket of *EcThrRS\_L489M*.**

**(a)** The catalytic center of *EcThrRS\_L489M* with bound OB. The phenolic group of Tyr462 (green sticks) forms a new ester bond with OB (orange sticks). Interacting residues are shown as sticks. The 2Fo-Fc electron density of Tyr462–OB (contoured at 1.0  $\sigma$ ) is shown as gray transparent surface. **(b)** Close-up view of residues coordinated with a Zn<sup>2+</sup> ion. Two hydroxyl groups on the *o*-diphenol moiety of OB coordinate with a Zn<sup>2+</sup> ion. Residues Cys334, His385, His511, Tyr462 and OB are shown as sticks. The 2Fo-Fc electron density of these residues (contoured at 1.0  $\sigma$ ) is shown as a transparent surface.



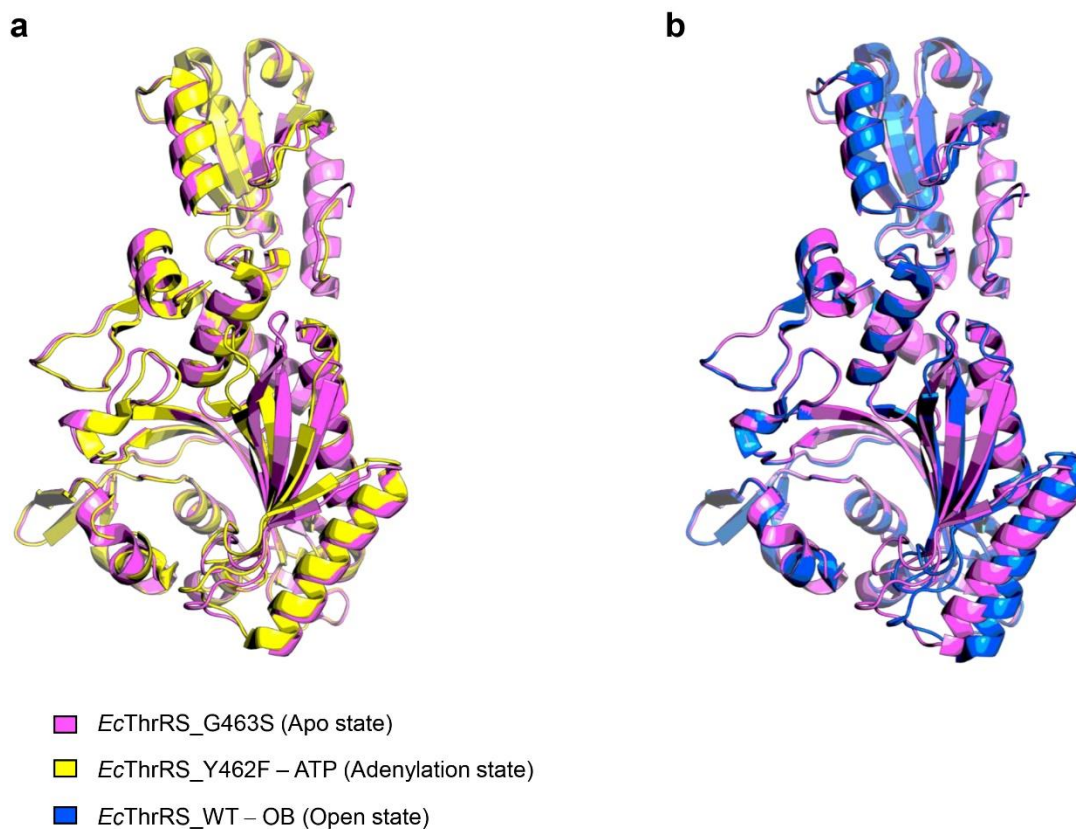

**Supplementary Figure 7. The catalytic pocket of *EcThrRS* slightly tightens when it binds to ATP and extends when it binds to OB.**

**(a)** Superimposition of the structures of *EcThrRS\_Y462F*–ATP (PDB code: 8H99, yellow cartoons) and *EcThrRS\_G463S* (violet cartoons). **(b)** Superimposition of the structures of *EcThrRS\_WT*–OB (PDB code: 8H98, marine cartoons) and *EcThrRS\_G463S* (violet cartoons).

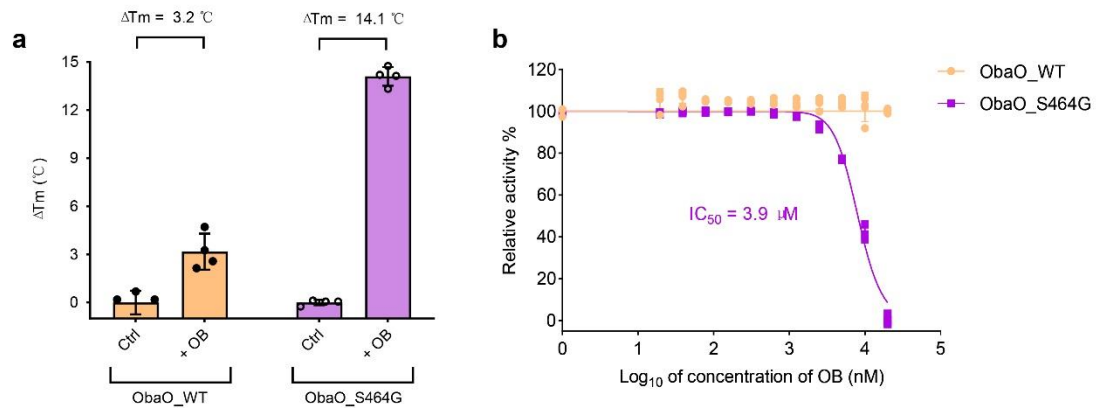

**Supplementary Figure 8. Mutation of Ser464 of ObaO to glycine results in sensitivity to OB.**

**(a)** Diagram of the  $\Delta T_m$  values of ObaO\_WT and ObaO\_S464G in the presence or absence of OB and 36j. Evaluations were carried out in four repeats, and error bars indicate the respective standard deviation ( $n = 4$ , mean value  $\pm$  SD). All the data points are shown as small circles. **(b)** Inhibitory curves of OB on the ATP hydrolysis activity of ObaO\_WT and ObaO\_S464G. Evaluations were carried out in four repeats, and error bars indicate the respective standard deviation ( $n = 4$ , mean value  $\pm$  SD). All the data points for ObaO\_WT and ObaO\_S464G are shown as violet dots and orange dots, respectively.

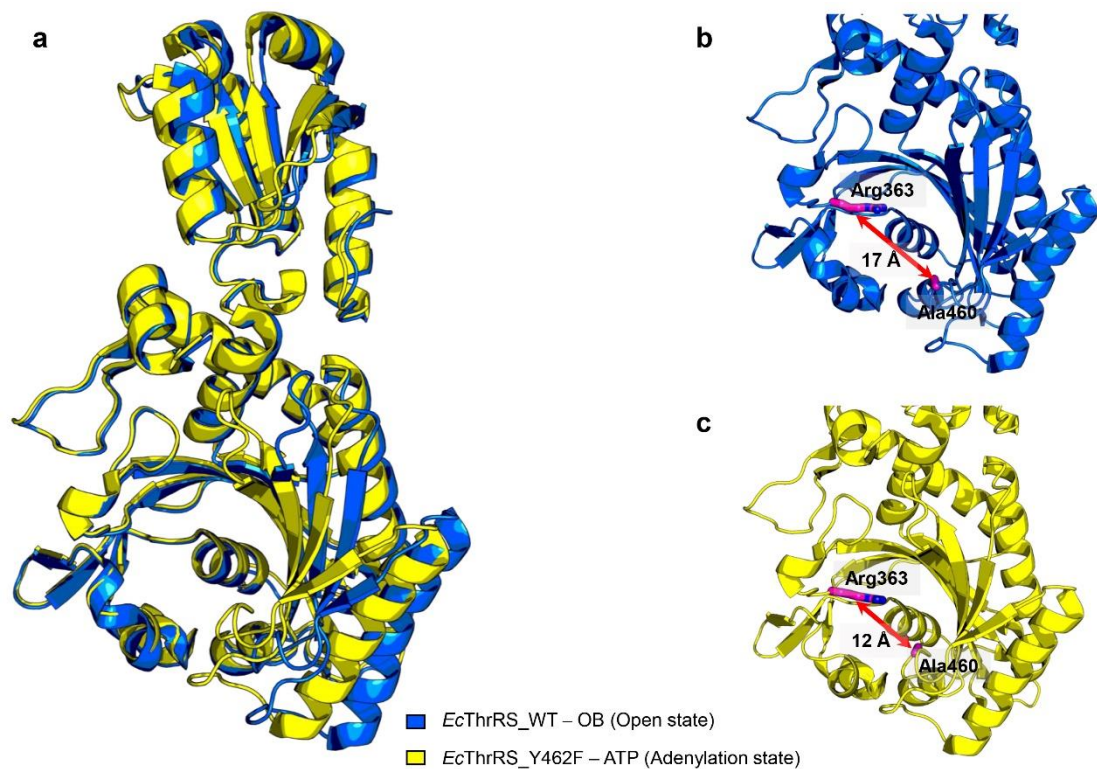

**Supplementary Figure 9. The distance between the centroids of Arg363 and Ala460 of *EcThrRS* changes when the protein binds different ligands.**

(a) Superimposition of the structures of *EcThrRS\_WT*–OB (PDB:8H98, marine cartoons) and *EcThrRS\_Y462F*–ATP (PDB: 8H99, yellow cartoons). (b) Zoomed-in view of the catalytic pocket of *EcThrRS\_WT*–OB. Arg363 and Ala460 are shown as violet sticks. The distances between the centroids of the two residues are shown as red directional arrows. (c) Zoomed-in view of the catalytic pocket of *EcThrRS\_Y462F*–ATP. Arg363 and Ala460 are shown as violet sticks. The distances between the centroids of the two residues are shown as red directional arrows.

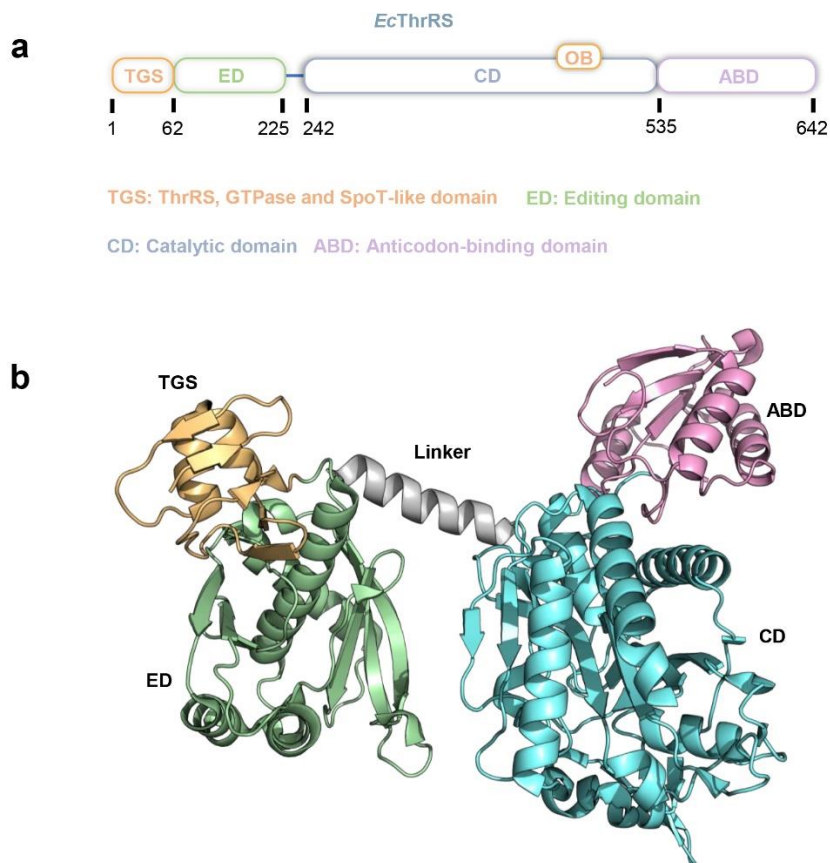

**Supplementary Figure 10. Schematic representation of the domain organization of *E. coli* ThrRS.**

**(a)** Domain organization of *EcThrRS*. TGS: ThrRS, GTPase and SpoT-like domain; ED: editing domain; CD: catalytic domain; ABD: anticodon-binding domain. **(b)** Structural illustration of *E. coli* ThrRS (PDB code: 1QF6). TGS is shown as wheat cartoons, ED is shown as green cartoons, CD is shown as cyan cartoons, and ABD is shown as pink cartoons. There is an  $\alpha$ -helix linker between the ED and CD domains, which divides ThrRS into two relatively independent fragments.

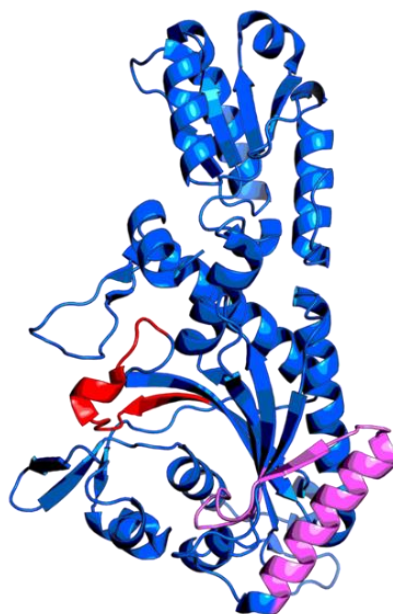

**Supplementary Figure 11. Locations of residues 358-373 and residues 432-465 in the *EcThrRS* structure.**

Residues 358-373 are shown as red cartoons and residues 432-465 are shown as violet cartoons.

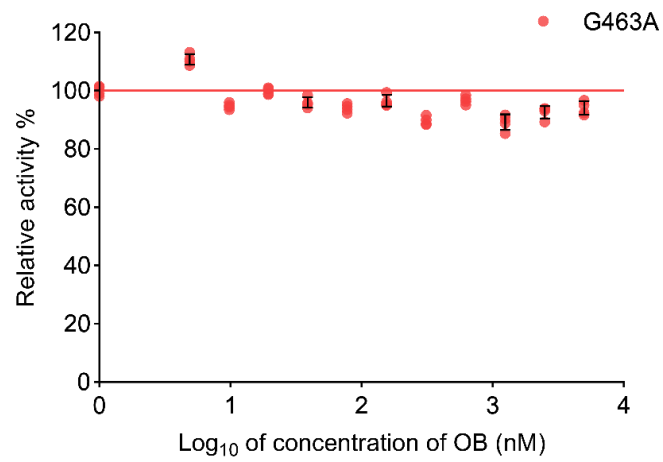

**Supplementary Figure 12. The inhibitory curve of OB on the ATP hydrolysis activity of *EcThrRS\_G463A*.**

Evaluations were carried out in four repeats, and error bars indicate the respective standard deviation (n = 4, mean value  $\pm$  SD). All the data points for *EcThrRS\_G463A* are shown as red dots.

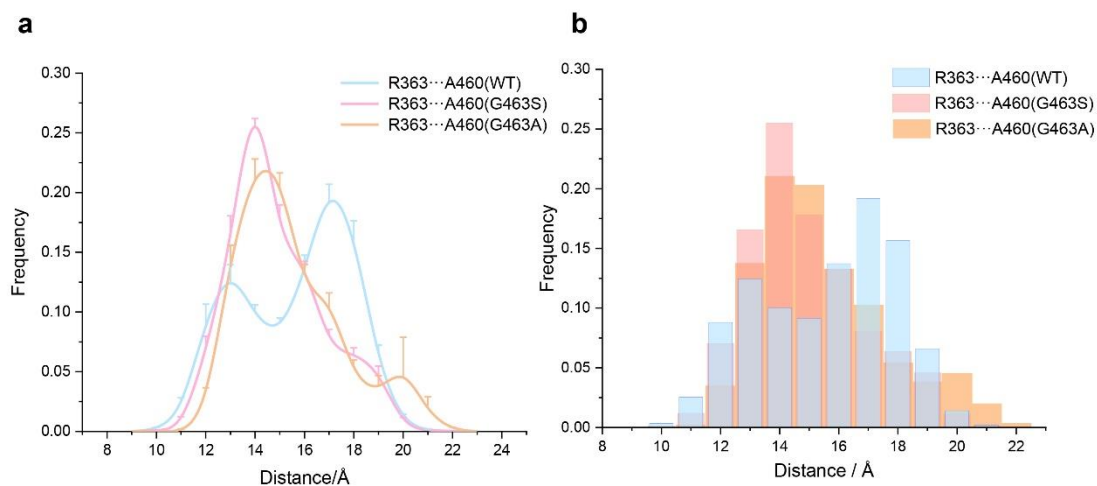

**Supplementary Figure 13. Comparison of the conformational spaces of *EcThrRS\_WT*, *G463S* and *G463A*.**

The distance between the center masses of the amino acid residues Arg363 and Ala460 is defined as the width of the catalytic pocket. 8 sets of simulations with different random initial velocities were performed, and data were collected from 9 to 23 Å per angstrom. Conformational space shifts ( $n = 8$ , mean value  $\pm$  SD) are shown as curves (**a**) or columns (**b**).

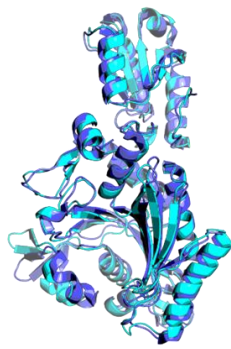

■ WT-OB (Open state)  
■ WT\_Nadir

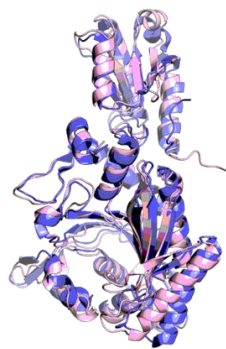

■ WT-OB (Open state)  
■ G463S\_Nadir

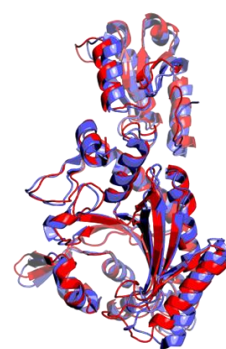

■ WT-OB (Open state)  
■ G463A\_Nadir

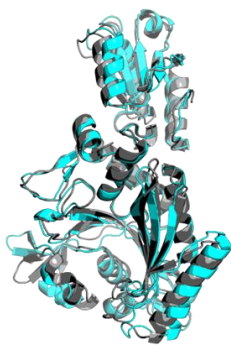

■ G463S (Apo state)  
■ WT\_Nadir

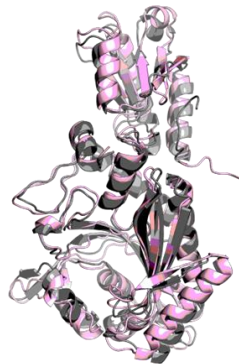

■ G463S (Apo state)  
■ G463S\_Nadir

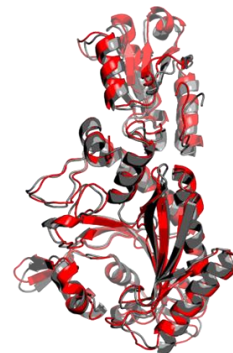

■ G463S (Apo state)  
■ G463A\_Nadir

**Supplementary Figure 14. Superimposition of crystal structures with structures taken from the free energy landscape nadir**

Suffix "Nadir" indicates the structures taken from the free energy landscape nadir.



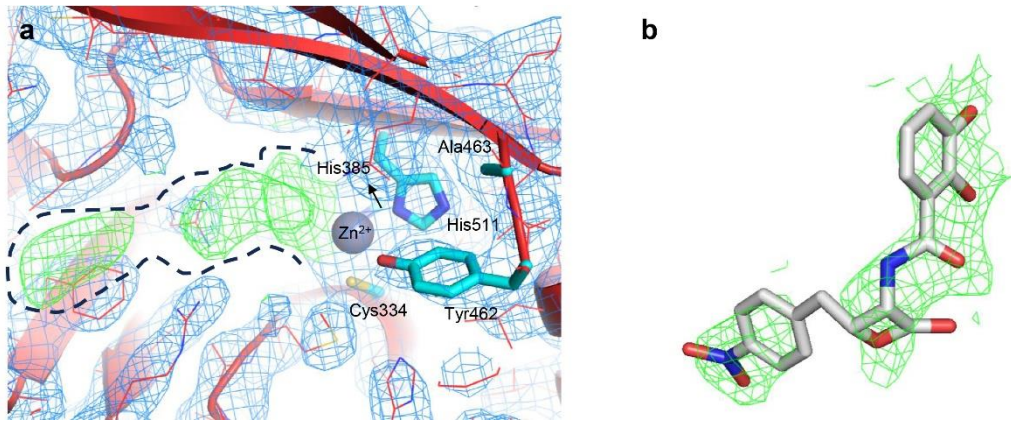

**Supplementary Figure 15. An unstable non covalent binding state of OB in *EcThrRS\_G463A*.**

**(a)** Zoomed-in view of the catalytic pocket of *EcThrRS\_G463A*, which was crystallized in the presence of OB. The 2Fo-Fc electron map (blue meshes, contoured at 1.0  $\sigma$ ) is shown together with the protein structure model. The Fo-Fc electron map (green meshes, contoured at 3.0  $\sigma$ ) showed positive peaks at the ATP binding site, which is circled by black dashed lines. The Cys334, His385, His511, Tyr462 and Ala463 residues are shown as cyan sticks. **(b)** The unoccupied electron map is filled with the OB structure.

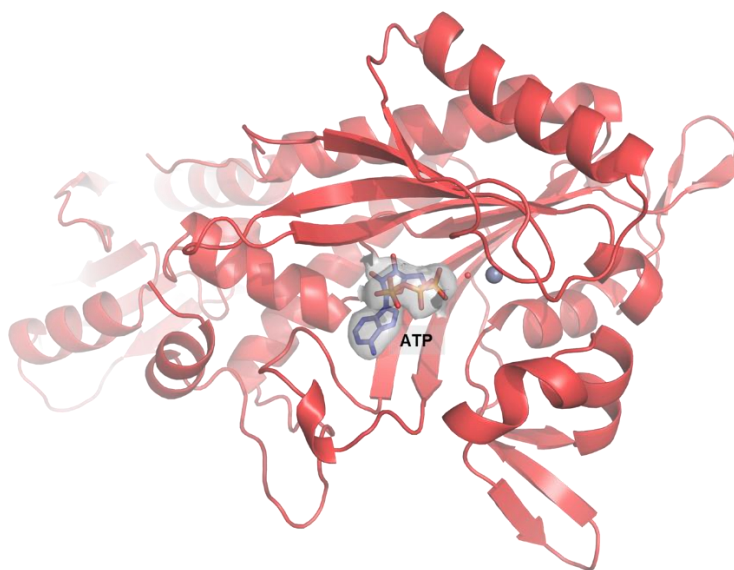

**Supplementary Figure 16. *EcThrRS\_G463A* only binds ATP in the presence of OB and ATP.**

The catalytic pocket of *EcThrRS\_G463A* is shown as red cartoons. ATP is shown as sticks. The 2Fo-Fc electron density of ATP (contoured at 1.0  $\sigma$ ) is shown as a transparent surface.

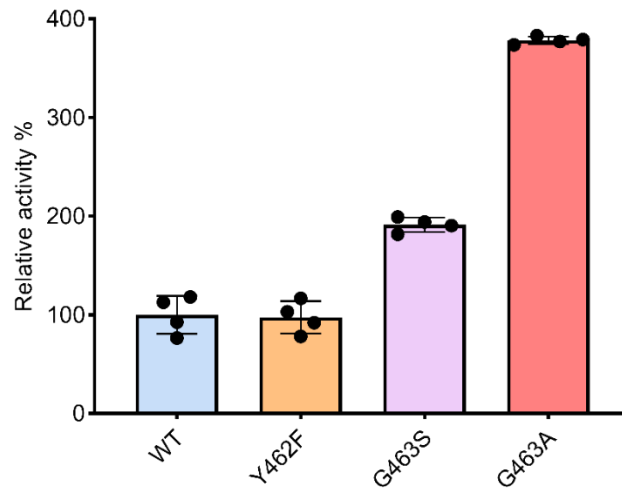

**Supplementary Figure 17. Relative ATP hydrolysis rates of *EcThrRS*\_WT, Y462F, G463S and G463A.**

Evaluations were carried out in four repeats, and error bars indicate the respective standard deviation ( $n = 4$ , mean value  $\pm$  SD). The ATP hydrolysis rate of *EcThrRS*\_WT was normalized to 100%.

#### IV. Supplementary Note 1

##### Key resources table

| REAGENT                                                 | SOURCE                                              | IDENTIFIER                                           |
|---------------------------------------------------------|-----------------------------------------------------|------------------------------------------------------|
| <b>Bacterial strains</b>                                |                                                     |                                                      |
| BL21 (DE3)                                              | Weidi                                               | CAT#EC1002                                           |
| DH5 $\alpha$ (DE3)                                      | Weidi                                               | CAT#DL1001                                           |
| <b>Chemicals, peptides and recombinant proteins</b>     |                                                     |                                                      |
| obafluorin                                              | GlpBio                                              | GC45617                                              |
| borrelidin                                              | GlpBio                                              | GC11040                                              |
| L-threonine                                             | Sigma-Aldrich                                       | T8375                                                |
| ATP                                                     | Sigma-Aldrich                                       | A26209                                               |
| SYPRO <sup>®</sup><br>Orange Dye                        | Sigma-Aldrich                                       | S5692                                                |
| <b>Critical commercial assays</b>                       |                                                     |                                                      |
| Kinase-Glo <sup>®</sup><br>Luminescent<br>Kinase Assays | Promega                                             | V6713                                                |
| Morpheus <sup>®</sup> I                                 | Molecular Dimension                                 | MD 1-46                                              |
| <b>Oligonucleotides</b>                                 |                                                     |                                                      |
| Primers                                                 | Sequence (5' to 3')                                 | Purpose                                              |
| <i>Ec</i> ThrRS-WT-B                                    | GTGGTGGTGCCTCGAGTTCCTCCAATTGTT<br>TAAGACTGCG        | For <i>Ec</i> ThrRS_WT<br>expression                 |
| pET28a-F                                                | CTTAAACAATTGGAGGAACTCGAGCACCA<br>CCACCAC            | For pET28a vector<br>recombination                   |
| pET28a-B                                                | GATTTTACGGTGGTCGCGCATGGTATATC<br>TCCTTCTTAAAGTTAAAC | For pET28a vector<br>recombination                   |
| <i>Ec</i> ThrRS_G463<br>S-F                             | AACTGGGTGAAGGCGCTTTCTACTCTCC<br>GAAAA               | For <i>Ec</i> ThrRS <sup>G463S</sup><br>construction |
| <i>Ec</i> ThrRS_G463                                    | TCAATTTTCGGAGAGTAGAAAGCGCCTTC                       | For <i>Ec</i> ThrRS <sup>G463S</sup>                 |

|                                  |                                                                                                                |                                                           |
|----------------------------------|----------------------------------------------------------------------------------------------------------------|-----------------------------------------------------------|
| S-B                              | ACCC                                                                                                           | construction                                              |
| <i>EcThrRS_L489</i><br>M-F       | TACAGTACAGCTGGACTTCTCTATGCCGT<br>CTC                                                                           | For <i>EcThrRS</i> <sup>L489M</sup><br>construction       |
| <i>EcThrRS_L489</i><br>M-B       | GACGAGACGGCATAGAGAAGTCCAGCTG<br>TACT                                                                           | For <i>EcThrRS</i> <sup>L489M</sup><br>construction       |
| <i>EcThrRS_G463</i><br>S_Q484A-F | GTGCGGTACAGTAGCGCTGGACTTCTCT<br>TTGCC                                                                          | For <i>EcThrRS</i> <sup>G463S_Q484A</sup><br>construction |
| <i>EcThrRS_G463</i><br>S_Q484A-B | CAAAGAGAAGTCCAGCGCTACTGTACCG<br>CACTGCCA                                                                       | For <i>EcThrRS</i> <sup>G463S_Q484A</sup><br>construction |
| <i>EcThrRS_G463</i><br>A-F       | AGGCGCTTTCTACGCACCGAAAATTGAAT<br>TTACCCT                                                                       | For <i>EcThrRS</i> <sup>G463A</sup><br>construction       |
| <i>EcThrRS_G463</i><br>A-B       | AATTCAATTTTCGGTGCGTAGAAAGCGCC<br>TTCACC                                                                        | For <i>EcThrRS</i> <sup>G463A</sup><br>construction       |
| <i>EcThrRS_A316</i><br>N-F       | AACTACAAAGATAACATGTTCCACCACATCT<br>TCTGA                                                                       | For <i>EcThrRS</i> <sup>A316N</sup><br>construction       |
| <i>EcThrRS_A316</i><br>N-B       | GAAGATGTGGTGAACATGTTATCTTTGTA<br>GTTGTC                                                                        | For <i>EcThrRS</i> <sup>A316N</sup><br>construction       |
| <i>ObaO_S464G-F</i>              | GAAGGTGCATTCTACGGTCCGAAGATCG<br>AATACCACC                                                                      | For <i>ObaO</i> <sup>S464G</sup><br>construction          |
| <i>ObaO_S464G-B</i>              | GTATTCGATCTTCGGACCGTAGAATGCAC<br>CTTCGCCT                                                                      | For <i>ObaO</i> <sup>S464G</sup><br>construction          |
| <b>Plasmids</b>                  |                                                                                                                |                                                           |
| pET-28a(+)                       | Protein expression vector used in <i>E. coli</i> ,<br>encoding N-terminal 6 × His-tag, kanamycin<br>resistance | Novagen                                                   |
| pTRS                             | pET-28a (+) derivative, containing<br><i>EcThrRS_242-642_WT_6×His</i>                                          | This study                                                |
| pTRS-G463S                       | pET-28a (+) derivative, containing<br><i>EcThrRS_242-642_G463S_6×His</i>                                       | This study                                                |

|                  |                                                                                                                      |                                                                                                                         |
|------------------|----------------------------------------------------------------------------------------------------------------------|-------------------------------------------------------------------------------------------------------------------------|
| pTRS-L489M       | pET-28a (+) derivative, containing<br>EcThrRS_242-642_L489M_6×His                                                    | This study                                                                                                              |
| pTRS-G463S_Q484A | pET-28a (+) derivative, containing<br>EcThrRS_242-642_G463S_Q484A_6×His                                              | This study                                                                                                              |
| pTRS-G463A       | pET-28a (+) derivative, containing<br>EcThrRS_242-642_G463A_6×His                                                    | This study                                                                                                              |
| pTRS-A316N       | pET-28a (+) derivative, containing<br>EcThrRS_242-642_A316N_6×His                                                    | This study                                                                                                              |
| pObaO-WT         | pET-28a (+) derivative, containing<br>ObaO_241-637_6×His                                                             | This study                                                                                                              |
| pObaO_S464G      | pET-28a (+) derivative, containing<br>ObaO_241-637_S464G_6×His                                                       | This study                                                                                                              |
| <b>Software</b>  |                                                                                                                      |                                                                                                                         |
| Jalview          | University of Dundee                                                                                                 | <a href="https://www.jalview.org">https://www.jalview.org</a>                                                           |
| XDS              | MPI for Medical Research                                                                                             | <a href="https://xds.mr.mpg.de">https://xds.mr.mpg.de</a>                                                               |
| CCP4             | Research Complex at Harwell (RCaH),<br>STFC Rutherford Appleton Laboratory,<br>Harwell Science and Innovation Campus | <a href="https://www.ccp4.ac.uk">https://www.ccp4.ac.uk</a>                                                             |
| COOT             | MRC Laboratory of Molecular Biology                                                                                  | <a href="https://www2.mrc-lmb.cam.ac.uk/personal/pemsley/coot">https://www2.mrc-lmb.cam.ac.uk/personal/pemsley/coot</a> |
| Phenix           | University of Cambridge, Duke University,<br>LANL, LBNL                                                              | <a href="https://phenix-online.org">https://phenix-online.org</a>                                                       |
| GraphPad Prism   | GraphPad Software Inc                                                                                                | <a href="http://www.graphpad.com">www.graphpad.com</a>                                                                  |
| PyMOL            | Schrödinger, LLC                                                                                                     | <a href="http://www.pymol.org">www.pymol.org</a>                                                                        |
| ChimeraX         | University of California San Francisco                                                                               | <a href="https://www.cgl.ucsf.edu/chimerax">https://www.cgl.ucsf.edu/chimerax</a>                                       |
| Schrödinger      | Schrödinger, LLC                                                                                                     | <a href="https://newsite.schrodinger.com">https://newsite.schrodinger.com</a>                                           |

**The sequence of the open reading frame of the pTRS plasmid encoding *Ec*ThrRS<sub>242-642\_WT-6×His</sub>:**

ATGCGCGACCACCGTAAAATCGGTAAACAGCTCGACCTGTACCATATGCAGGAAGAAGCG  
CCGGGTATGGTATTCTGGCACAACGACGGCTGGACCATCTTCCGTGAACTGGAAGTGTTT  
GTTTCGTTCTAAACTGAAAGAGTACCAGTATCAGGAAGTTAAAGGTCCGTTTCATGATGGAC  
CGTGTCTGTGGGAAAAAACCGGTCACTGGGACAACACTACAAAGATGCAATGTTACCAC  
ATCTTCTGAGAACCGTGAATACTGCATTAAGCCGATGAACTGCCCGGGTCACGTACAAATT  
TTCAACCAGGGGCTGAAGTCTTATCGCGATCTGCCGCTGCGTATGGCCGAGTTTGGTAG  
CTGCCACCGTAACGAGCCGTCAGGTTGCTGCATGGCCTGATGCGCGTGCCTGGATTTA  
CCCAGGATGACGCGCATATCTTCTGTAAGAAACAAATTCGCGATGAAGTTAACGGAT  
GTATCCGTTTAGTCTATGATATGTACAGCACTTTTGGCTTCGAGAAGATCGTCGTCAA  
CTCCACTCGTCCTGAAAAACGTATTGGCAGCGACGAAATGTGGGATCGTGCTGAGGCGG  
ACCTGGCGGTTGCGCTGGAAGAAAACAACATCCCGTTTGAATATCAACTGGGTGAAGGC  
GCTTTCTACGGTCCGAAAATTGAATTTACCCTGTATGACTGCCTCGATCGTGCATGGCAGT  
GCGGTACAGTACAGCTGGACTTCTCTTTGCCGTCTCGTCTGAGCGCTTCTTATGTAGGCG  
AAGACAATGAACGTAAAGTACCGGTAATGATTCACCGCGCAATTCTGGGGTCGATGGAAC  
GTTTCATCGGTATCCTGACCGAAGAGTTCGCTGGTTTCTTCCCGACCTGGCTTGCGCCG  
GTTTCAGGTTGTTATCATGAATATTACCGATTACAGTCTGAATACGTTAACGAATTGACGCA  
AAAATATCAAATGCGGGCATTTCGTGTTAAAGCAGACTTGAGAAATGAGAAGATTGGCTTT  
AAAATCCGCGAGCACACTTTGCGTTCGCGTCCCATATATGCTGGTCTGTGGTGATAAAGAG  
GTGGAATCAGGCAAAGTTGCCGTTTCGACCCGCCGTGGTAAAGACCTGGGAAGCATGG  
ACGTAAATGAAGTGATCGAGAAGCTGCAACAAGAGATTGCGAGCCGCAGTCTTAAACAAT  
TGGAGGAACTCGAGCACCACCACCACCACCTGA

**The sequence of the *Ec*ThrRS<sub>WT (242-642)</sub> protein:**

MRDHRKIGKQLDLYHMQEEAPGMVFWHNDGWTIFRELEVFRSKLKEYQYQEVKGFMMMD  
RVLWEKTGHWDNYKDAMFTTSSENREYCIKPMNCPGHVQIFNQGLKSYRDLPLRMAEFGS  
CHRNEPSGSLHGLMRVRGFTQDDAHIFCTEEQIRDEVNGCIRLVYDMYSTFGFEKIVVKLST  
RPEKRIGSDEMWDRAEADLAVALEENNIPFEYQLGEGAFYGPKIEFTLYDCLDRAWQCGTVQ  
LDFSLPSRLSASYVGEDNERKVPVMIHRAILGSMERFIGILTEEFAGFFPTWLAPVQVIMNIT

DSQSEYVNELTQKLSNAGIRVKADLRNEKIGFKIREHTLRRVPYMLVCGDKEVESGKVAVRTR  
RGKDLGSM DVNEVIEKLQQEIRSRSLKQLEEELEHHHHH\*

**The sequence of the open reading frame of the pObaO plasmid encoding ObaO<sub>241-637</sub>\_WT-6×His:**

ATGCGTGACCACCGTAAACTGGCTAAACAGTTCGACCTGTTCCACCAGCAAGAAGAAG  
CTCCAGGTATGGTCTTCTGGCATCCGAAAGTTGGAGCCTGTGGCAGACCGTTGAACAG  
TACATGCGTCGTGTTTATCGTGATGGCGGTTACCGTGAAGTTAAATCTCCGCAGGTA  
GATTCTACTCTGTGGAAGAAGAGCGGCCACTGGGATAACTACAAAGAGAACATGTT  
ACCGAATCCGAGAACCGTCAGTACGCACTGAAACCGATGAACTGTCCGGGTCACATCCA  
AATCTTCAAACACGGTCTGCGTAGCCATCGTGAAGTCCGATCCGTTACGGTGAATTTGG  
TGGCTGCCACCGTAACGAACCATCTGGCGCTCTGCACGGCATCATGCGTGTTTCGTGCAT  
TCACTCAAGATGATGGCCACATCTTCTGCACCGAAGAACAGATCGCGGCGGAAATCAAAG  
CATTCCACTATCAGGCGGTTAAAGTTTACGCGGATTTTCGGTTTCACCGACATCGCTGTTAA  
GATCGCTCTGCGTCCGGAACCGGGTAAACGTCTGGGTTCCGACGAAGTTTGGGACAAAG  
CGGAGAACCTGCTGCGTGAAGCGCTGTCTGAATGCGACGTTGAATGGGAAGAACTGCCA  
GGCGAAGGTGCATTCTACAGTCCGAAGATCGAATACCACCTGCGTGATGCTATCGGTTCGT  
GAATGGCAGGTTGGTACTATGCAGGTTGACTACCACATGCCAGATCGTCTGGGTGCAGAA  
TACGTTGATGAACACAGCCAGCGTCGTAACCGGTTATGCTGCATCGTGCATCGTGGGT  
AGCCTGGAACGCTTTCTGGGTATCTTGATCGAACACCACGCAGGTCAGTTCCCGCTGTG  
GCTGGCGCCGGTGCAGGCTATCGTGGTTACCGTTACCGACGCTCAGAACGATTACGCTG  
ACCAGACTCGTAACGATCTGGTTCAGTTGGGCTTCCGTGTGGAAGCGGACCTGCGTAAC  
GAGAAGATCGGCTACAAGATCCGTGAATCTACCTTGACGCGTGTACCGTACCTGCTGGTA  
GTTGGTGAACGTGAGAAAGAGAACGGCACCGTAACCGTTCGTTCTCGTGCGGGTGAAG  
ACCTGGGTTCTATGACGATGGAAGCGCTGCATGCGTTTCTGCTGAACGAACAGTCTGCG  
GGTGGTCTCGAGCACCACCACCACCACCTGA

**The sequence of the ObaO(241-637) protein:**

MRDHRKLAQKQFDLFHQEEAPGMVFWHPKGSWQVTEQYMRRVYRDGGYREVKSPQ



VLDSTLWKKSGHWDNYKENMFVTESENQYALKPMNCPGHIQIFKHGLRSHRELPIRYGEF  
GGCHRNEPSGALHGIMRVRAFTQDDGHIFCTEEQIAAEIKAFHYQAVKVYADFGFTDIAVKIAL  
RPEPGKRLGSDEVWDKAENLLREALSECDVEWEELPGEGAFYSPKIEYHLRDAIGREWQVG  
TMQVDYHMPDRLGAEYVDEHSQRRKPVMLHRAIVGSLERFLGILIEHHAGQFPLWLAPVQAI  
VVTVTD AQNDYADQTRNDLVQLGFRVEADLRNEKIGYKIRESTLQRVPYLLVGEREKENGT  
VTVRSRAGEDLGSMTMEALHAFLLNEQSAGGLEHHHHHH

### Abbreviations

|                         |                                                                                                            |
|-------------------------|------------------------------------------------------------------------------------------------------------|
| ThrRS                   | threonyl-tRNA synthetase                                                                                   |
| ObaO                    | a threonyl-tRNA synthetase homolog of <i>Pseudomonas fluorescens</i> which confers resistance to Obafuorin |
| WT                      | wild type                                                                                                  |
| OB                      | obafuorin                                                                                                  |
| BN                      | borrelidin                                                                                                 |
| L-Thr                   | L-threonine                                                                                                |
| ATP                     | adenosine 5'-triphosphate                                                                                  |
| Tris                    | Tris(hydroxymethyl)aminomethane                                                                            |
| MES                     | 2-morpholinoethanesulphonic acid                                                                           |
| HEPES                   | 4-(2-Hydroxyethyl)-1-piperazine ethanesulfonic acid                                                        |
| MOPS                    | 3-( <i>N</i> -Morpholino)propanesulfonic acid                                                              |
| MPD                     | 2-methyl-2,4-pentanediol                                                                                   |
| PEG                     | polyethylene glycol                                                                                        |
| MME                     | monomethyl ester                                                                                           |
| TSA                     | thermal shift assay                                                                                        |
| T <sub>m</sub>          | mid-melting point                                                                                          |
| MD                      | molecular dynamics                                                                                         |
| DCCM                    | dynamic cross-correlation maps                                                                             |
| <i>D</i> <sub>R-A</sub> | distance between Arg363 and Ala460 of <i>E. coli</i> ThrRS                                                 |
| FEL                     | free energy landscape                                                                                      |
| R <sub>g</sub>          | radius of gyration                                                                                         |
| IC <sub>50</sub>        | half-maximal inhibitory concentration                                                                      |
| SBVS                    | structure-based virtual screen                                                                             |
| BTK                     | Bruton's Tyrosine Kinase                                                                                   |
| NRPS                    | non-ribosomal peptide synthetase                                                                           |
| MoA                     | mechanism of action                                                                                        |
| PDB                     | protein data bank                                                                                          |

## V. Supplementary References

1. Consortium, T. U. UniProt: a worldwide hub of protein knowledge. *Nucleic Acids Research* **47**, D506-D515 (2018).
2. Bairoch, A. The ENZYME database in 2000. *Nucleic Acids Research* **28**, 304-305 (2000).
3. Kumar, S., Stecher, G. & Tamura, K. MEGA7: Molecular Evolutionary Genetics Analysis Version 7.0 for Bigger Datasets. *Molecular Biology and Evolution* **33**, 1870-1874 (2016).
4. Letunic, I. & Bork, P. Interactive Tree of Life (iTOL) v6: recent updates to the phylogenetic tree display and annotation tool. *Nucleic Acids Research*. gkae268 (2024).
5. Sievers, F. & Higgins, D. G. Clustal Omega for making accurate alignments of many protein sequences. *Protein Science* **27**, 135-145 (2018).
6. Robert, X. & Gouet, P. Deciphering key features in protein structures with the new ENDscript server. *Nucleic Acids Research* **42**, W320-W324 (2014).
